# Supplementary material
Source: Springer Nature journal article supplement (https://www.springermedizin.de/resource/supplementary/12931_2010_1116_MOESM1_ESM.pdf/9425686)

### H09 - Baseline

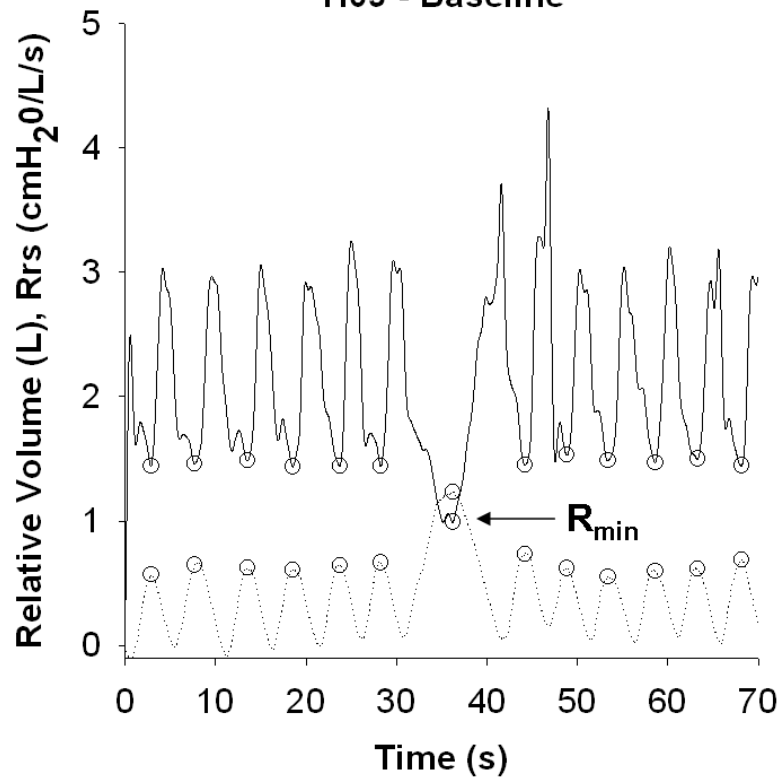

### A04 - Baseline

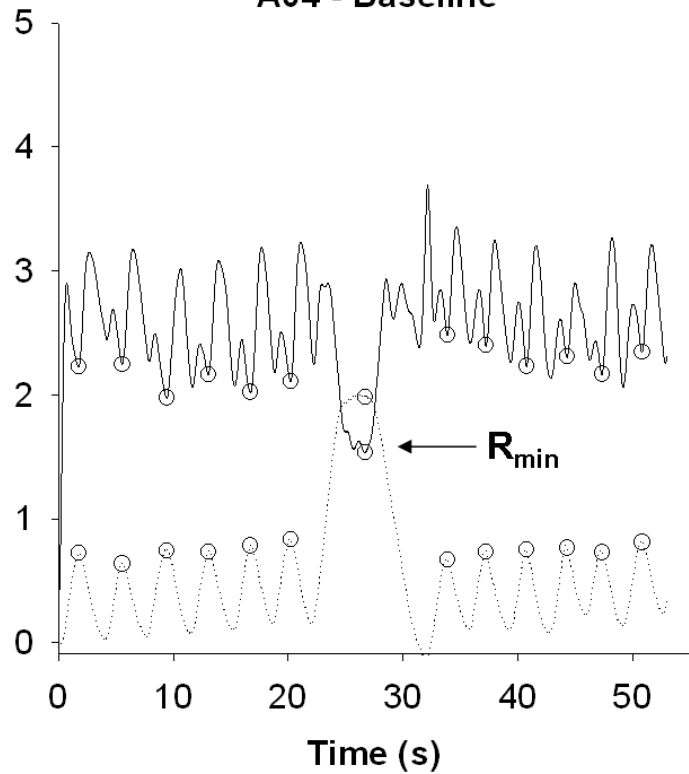

Supplement: MOESM1 [file 9425686]
